# Supplementary material
Source: PubMed Central journal article supplement (PMC1892966)

## Supporting Text

### **Synthetic diazonamides: Spectroscopic data for AB-5 and probe reagent syntheses**

Preparation of the core diazonamide ring system from which the molecules below derive is described in Burgett AW, Li Q, Wei Q, Harran PG (2003) *Angew Chem Intl Ed Engl* 42:4961-4966.

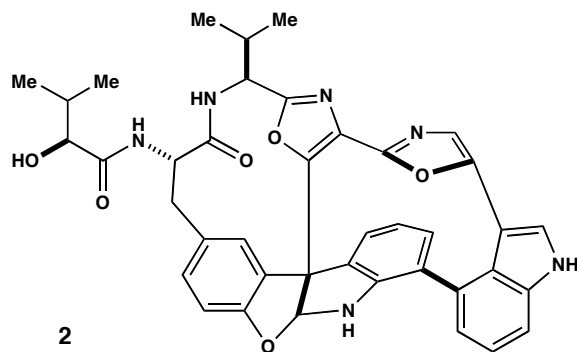

2

(aka AB-5)

$[\alpha]_D^{25} = -230.9^\circ$  ( $c = 0.01$ , 30%  $\text{CH}_3\text{OH}/\text{CHCl}_3$ ). IR (film): 3396, 2360, 1651, 1493, 668  $\text{cm}^{-1}$ .  $^1\text{H}$  NMR (400 MHz, 90%  $\text{CD}_3\text{OD}/\text{CHCl}_3$ ):  $\delta$  7.52 (dd,  $J = 8.4, 0.8$  Hz, 1H), 7.46 (s, 1H), 7.40 (d,  $J = 1.6$  Hz, 1H), 7.34 (m, 1H), 7.21–7.17 (m, 2H), 7.00 (dd,  $J = 7.6, 1.2$  Hz, 1H), 6.89 (s, 1H), 6.82 (dd,  $J = 7.6, 0.8$ , 1H), 6.78 (d,  $J = 8.4$  Hz, 1H), 6.61 (t,  $J = 7.6$  Hz, 1H), 6.36 (s, 1H), 4.60 (dd,  $J = 11.6, 3.6$  Hz, 1H), 3.89 (d,  $J = 3.6$ , 1H), 3.43–3.34 (m, 1H), 2.80 (dd,  $J = 11.6, 3.2$  Hz, 1H), 2.27–2.22 (m, 1H), 2.14–2.00 (m, 1H), 1.07 (d,  $J = 6.8$  Hz, 3H), 1.03 (d,  $J = 6.8$  Hz, 3H), 0.96 (d,  $J = 6.8$  Hz, 3H), 0.92 (d,  $J = 6.8$  Hz, 3H);  $^{13}\text{C}$  NMR (300 MHz, 30%  $\text{CD}_3\text{OD}/\text{CHCl}_3$ ):  $\delta$  174.3, 173.0, 160.7, 158.0, 154.1, 151.9, 149.2, 148.2, 137.1, 130.8, 130.2, 130.1, 129.7, 128.3, 128.1, 127.6, 127.5, 126.3, 124.8, 123.7, 122.9, 122.8, 122.6, 121.3, 120.4, 111.8, 110.3, 104.5, 102.4, 75.6, 61.3, 55.8, 54.9, 37.9, 31.7, 30.1, 18.9, 18.6, 17.6, 15.4. ES-MS: calculated. for  $\text{C}_{40}\text{H}_{36}\text{N}_6\text{O}_6$   $[\text{M}+\text{H}]^+$  697.27, found:697.20; calculated. for  $\text{C}_{43}\text{H}_{40}\text{Cl}_2\text{N}_6\text{O}_7$   $[\text{M}-\text{H}]^-$  695.28, found:695.25.

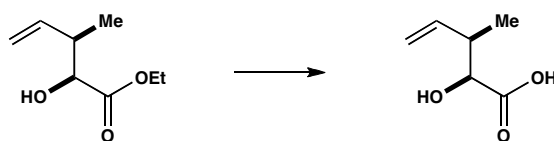

(2S,3R)-3

4

Evans et al  
*J. Am. Chem. Soc.*  
 (2000) 122, 7936-7943.

(2S,3R)-Ethyl 3-methyl-2-hydroxy-4-pentenoate (**3**) (20.0 mg, 0.127 mmol, prep HPLC purified) was dissolved in 0.7 mL MeOH and treated with 0.7 mL 10% aq KOH. The solution was stirred at room temperature for 2 h, diluted with saturated

NH<sub>4</sub>Cl, and extracted with EtOAc (3x). The organic layers were combined, washed with brine, dried (Na<sub>2</sub>SO<sub>4</sub>) and concentrated in vacuo. Crude **4** thus obtained (10.0 mg) was used without further purification.

**4**: <sup>1</sup>H-NMR (400 MHz, CD<sub>3</sub>OD): δ 5.87–5.78 (m, 1H), 5.06 (d, *J* = 16.8 Hz, 1H), 5.01 (d, *J* = 10.0 Hz, 1H), 4.05 (d, *J* = 3.6 Hz, 1H), 2.65 (br s, 1H), 1.12 (d, *J* = 7.2 Hz, 3H).

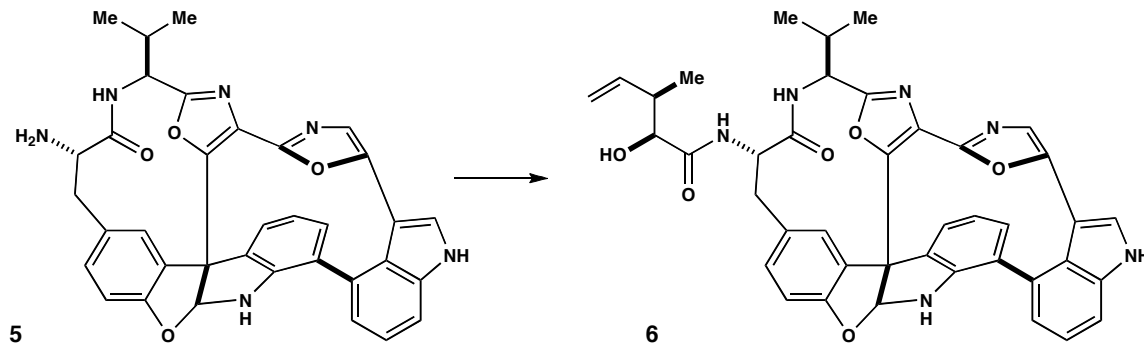

Amine **5** (3.0 mg, 5 μmol) was dissolved in 0.2 mL THF and cooled to 0°C under N<sub>2</sub>. Carboxylic acid **4** was added as a stock solution (0.08M in dry THF, 90 μL, 7 μmol). (EtO)<sub>2</sub>P(O)CN (4.3 mg, 0.026 mmol) was then added, followed by 4-methylmorpholine (3.7 mg, 0.026 mmol). The solution was warmed to room temperature and stirred for 1.5 h. The reaction was diluted in 10 mL EtOAc, washed with NaHCO<sub>3</sub>, H<sub>2</sub>O, sat aq NH<sub>4</sub>Cl, brine, and dried over Na<sub>2</sub>SO<sub>4</sub>. Preparative TLC (10% MeOH/CH<sub>2</sub>Cl<sub>2</sub>) afforded acyl derivative **6** (2 mg, 60% yield) as a white film.

**6**: <sup>1</sup>H-NMR (400 MHz, CD<sub>3</sub>OD): δ 7.52 (dd, *J* = 8.4, 1.2 Hz, 1H), 7.46 (s, 1H), 7.39 (d, *J* = 1.6 Hz, 1H), 7.34 (m, 1H), 7.19 – 7.16 (m, 2H), 7.00 (dd, *J* = 7.6, 1.2 Hz, 1H), 6.89 (s, 1H), 6.83 (dd, *J* = 7.2, 1.2 Hz, 1H), 6.78 (d, *J* = 8.4, 1H), 6.62 (t, *J* = 7.2 Hz, 1H), 6.35 (s, 1H), 5.89–5.80 (m, 1H), 5.11 – 5.05 (m, 2H), 4.57 (dd, *J* = 12.0, 3.2 Hz, 1H), 3.98 (d, *J* = 3.6 Hz, 1H), 3.35 (app t, *J* = 12.0 Hz, 1H), 2.76 (dd, *J* = 12.8, 3.2 Hz, 1H), 2.68 (m, 1H), 2.24 (m, 1H), 1.15 (d, *J* = 10.8 Hz, 3H), 1.06 (d, *J* = 10.8 Hz, 3H), 0.96 (d, *J* = 6.8 Hz).

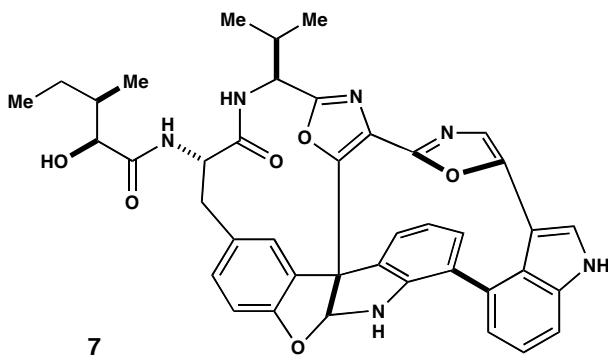

7

(aka AB-9)

Olefin **6** (2.0 mg, 3  $\mu$ mol) and 10% Pd/C (~ 1 mg) were suspended in 0.3 mL anhydrous MeOH under an atmosphere of H<sub>2</sub> (balloon). The reaction was stirred vigorously for 30 min, filtered through a plug of celite and concentrated. Preparative HPLC [Higgins C18, 60 $\rightarrow$ 100% CH<sub>3</sub>OH/H<sub>2</sub>O gradient] provided hydrogenation product **7** (~ 2.0 mg) as a white film.

**7 (AB-9)**: <sup>1</sup>H-NMR (400 MHz, CD<sub>3</sub>OD):  $\delta$  7.52 (dd,  $J$  = 8.4, 0.8 Hz, 1H), 7.45 (s, 1H), 7.40 (d,  $J$  = 1.6 Hz, 1H), 7.34 (m, 1H), 7.21–7.17 (m, 2H), 7.00 (dd,  $J$  = 7.2, 1.2 Hz, 1H), 6.89 (s, 1H), 6.83 (d,  $J$  = 7.2 Hz, 1H), 6.78 (d,  $J$  = 8.0 Hz, 1H), 6.62 (t,  $J$  = 7.2 Hz, 1H), 6.36 (s, 1H), 4.59 (dd,  $J$  = 12.0, 3.2 Hz, 1H), 3.93 (d,  $J$  = 4.4 Hz, 1H), 3.43–3.34 (m, 1H), 2.79 (dd,  $J$  = 12.8, 3.6 Hz, 1H), 2.30–2.21 (m, 1H), 1.88–1.84 (m, 1H), 1.54–1.48 (m, 1H), 1.07 (d,  $J$  = 6.8 Hz, 3H), 1.00 (d,  $J$  = 6.8 Hz, 3H), 0.96 (d,  $J$  = 6.8 Hz, 3H), 0.943 (t,  $J$  = 7.6 Hz, 3H).

ES-MS: calculated. for C<sub>41</sub>H<sub>38</sub>N<sub>6</sub>O<sub>6</sub> [M+H]<sup>+</sup> 711.28, found: 711.25; calculated. for C<sub>43</sub>H<sub>40</sub>Cl<sub>2</sub>N<sub>6</sub>O<sub>7</sub> [M-H]<sup>-</sup> 709.28, found: 709.35.

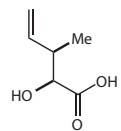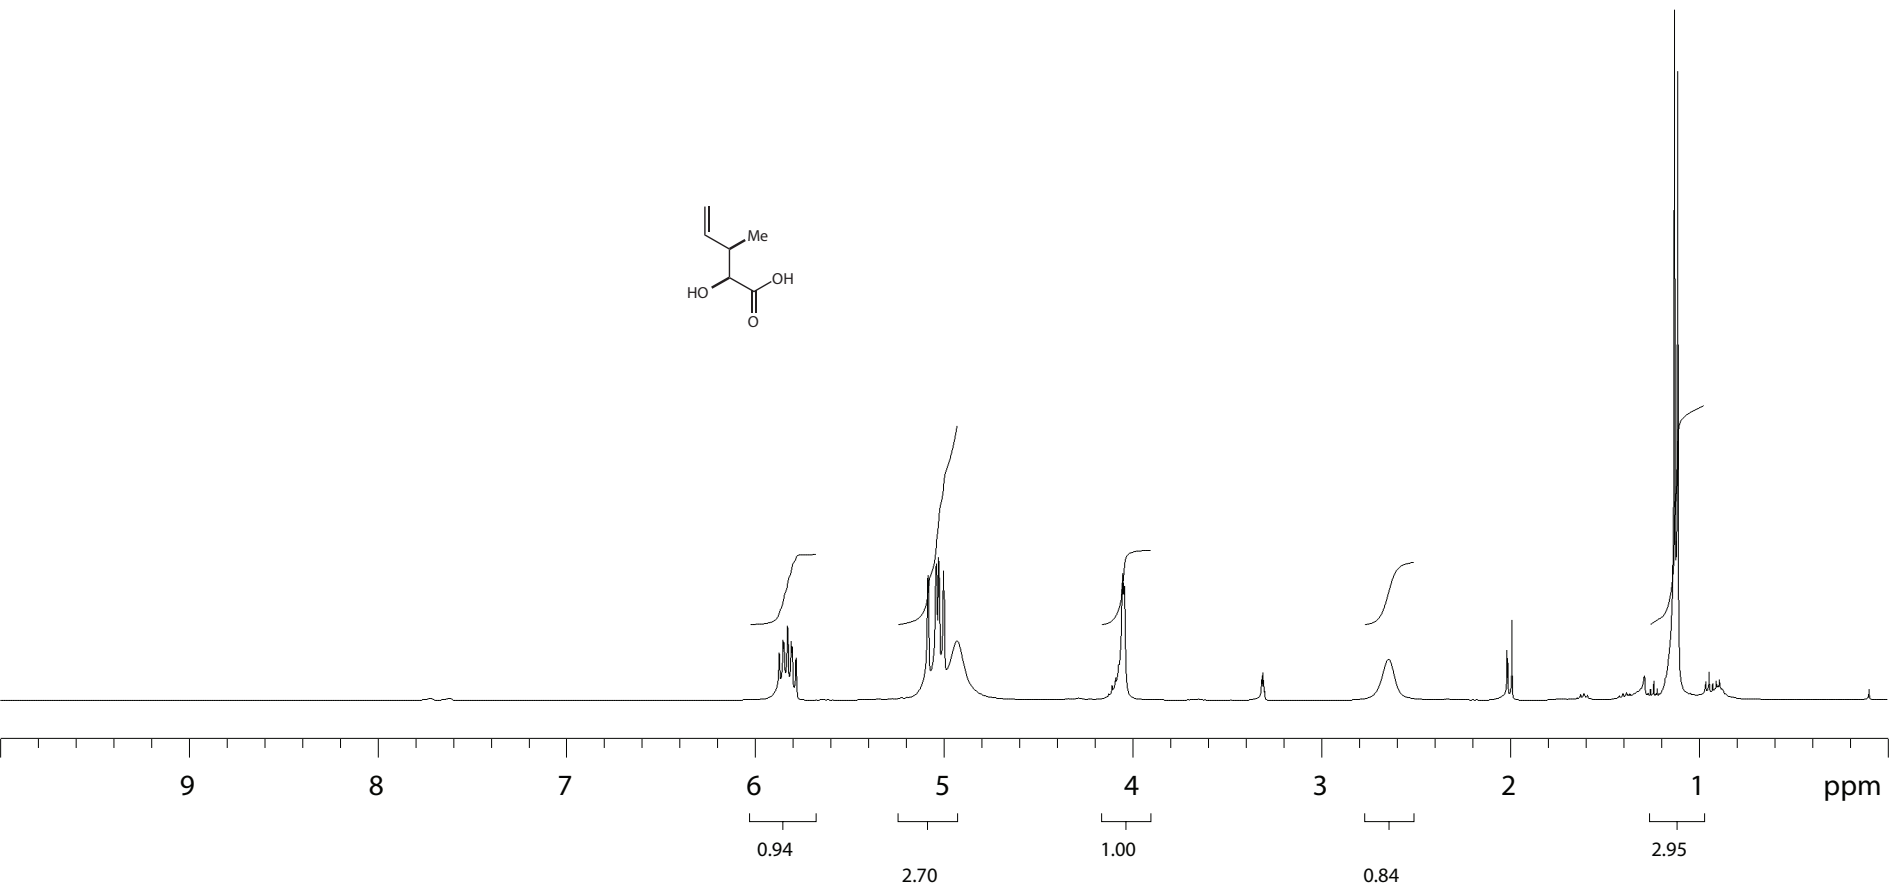

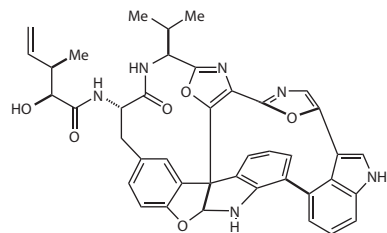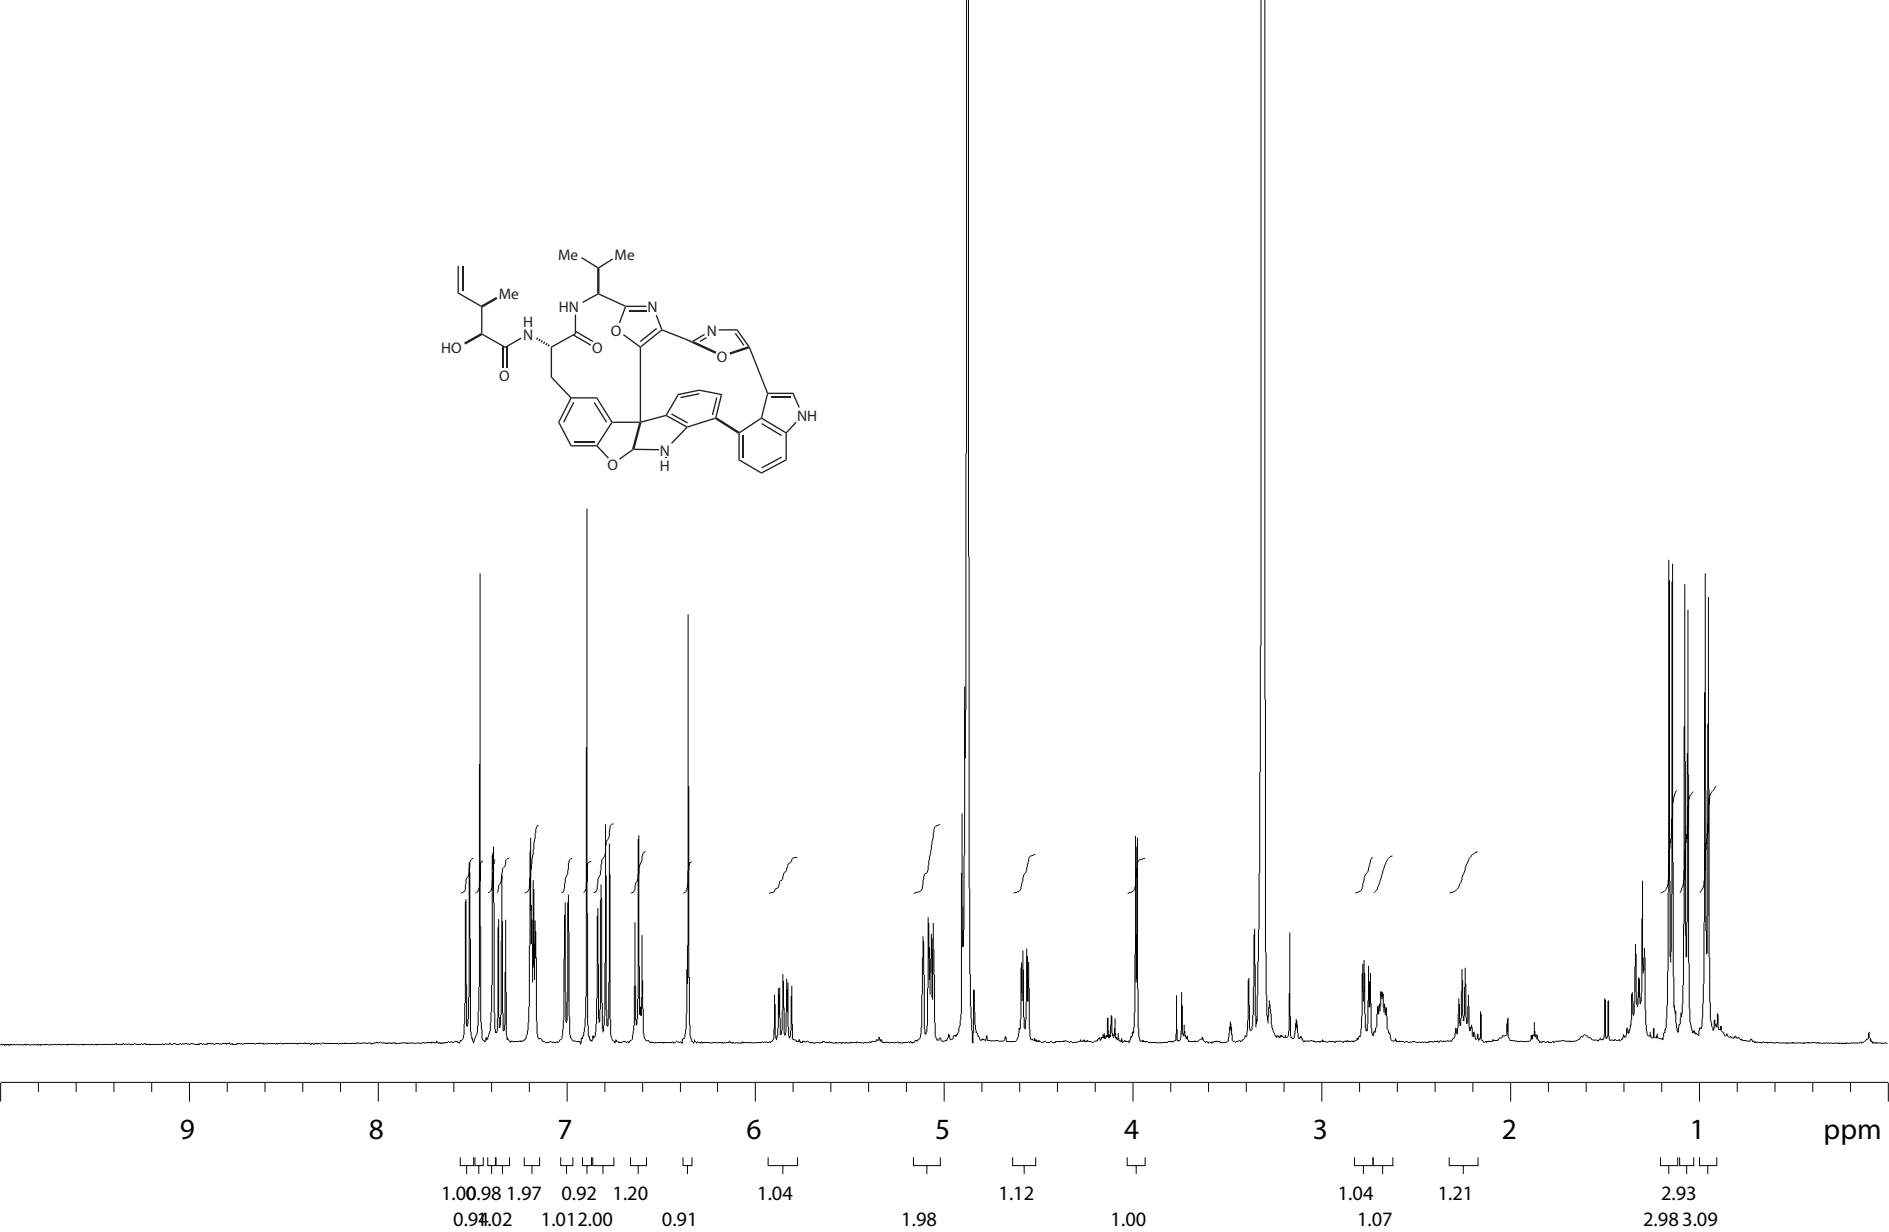

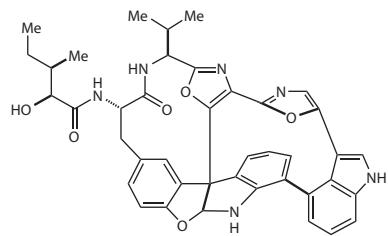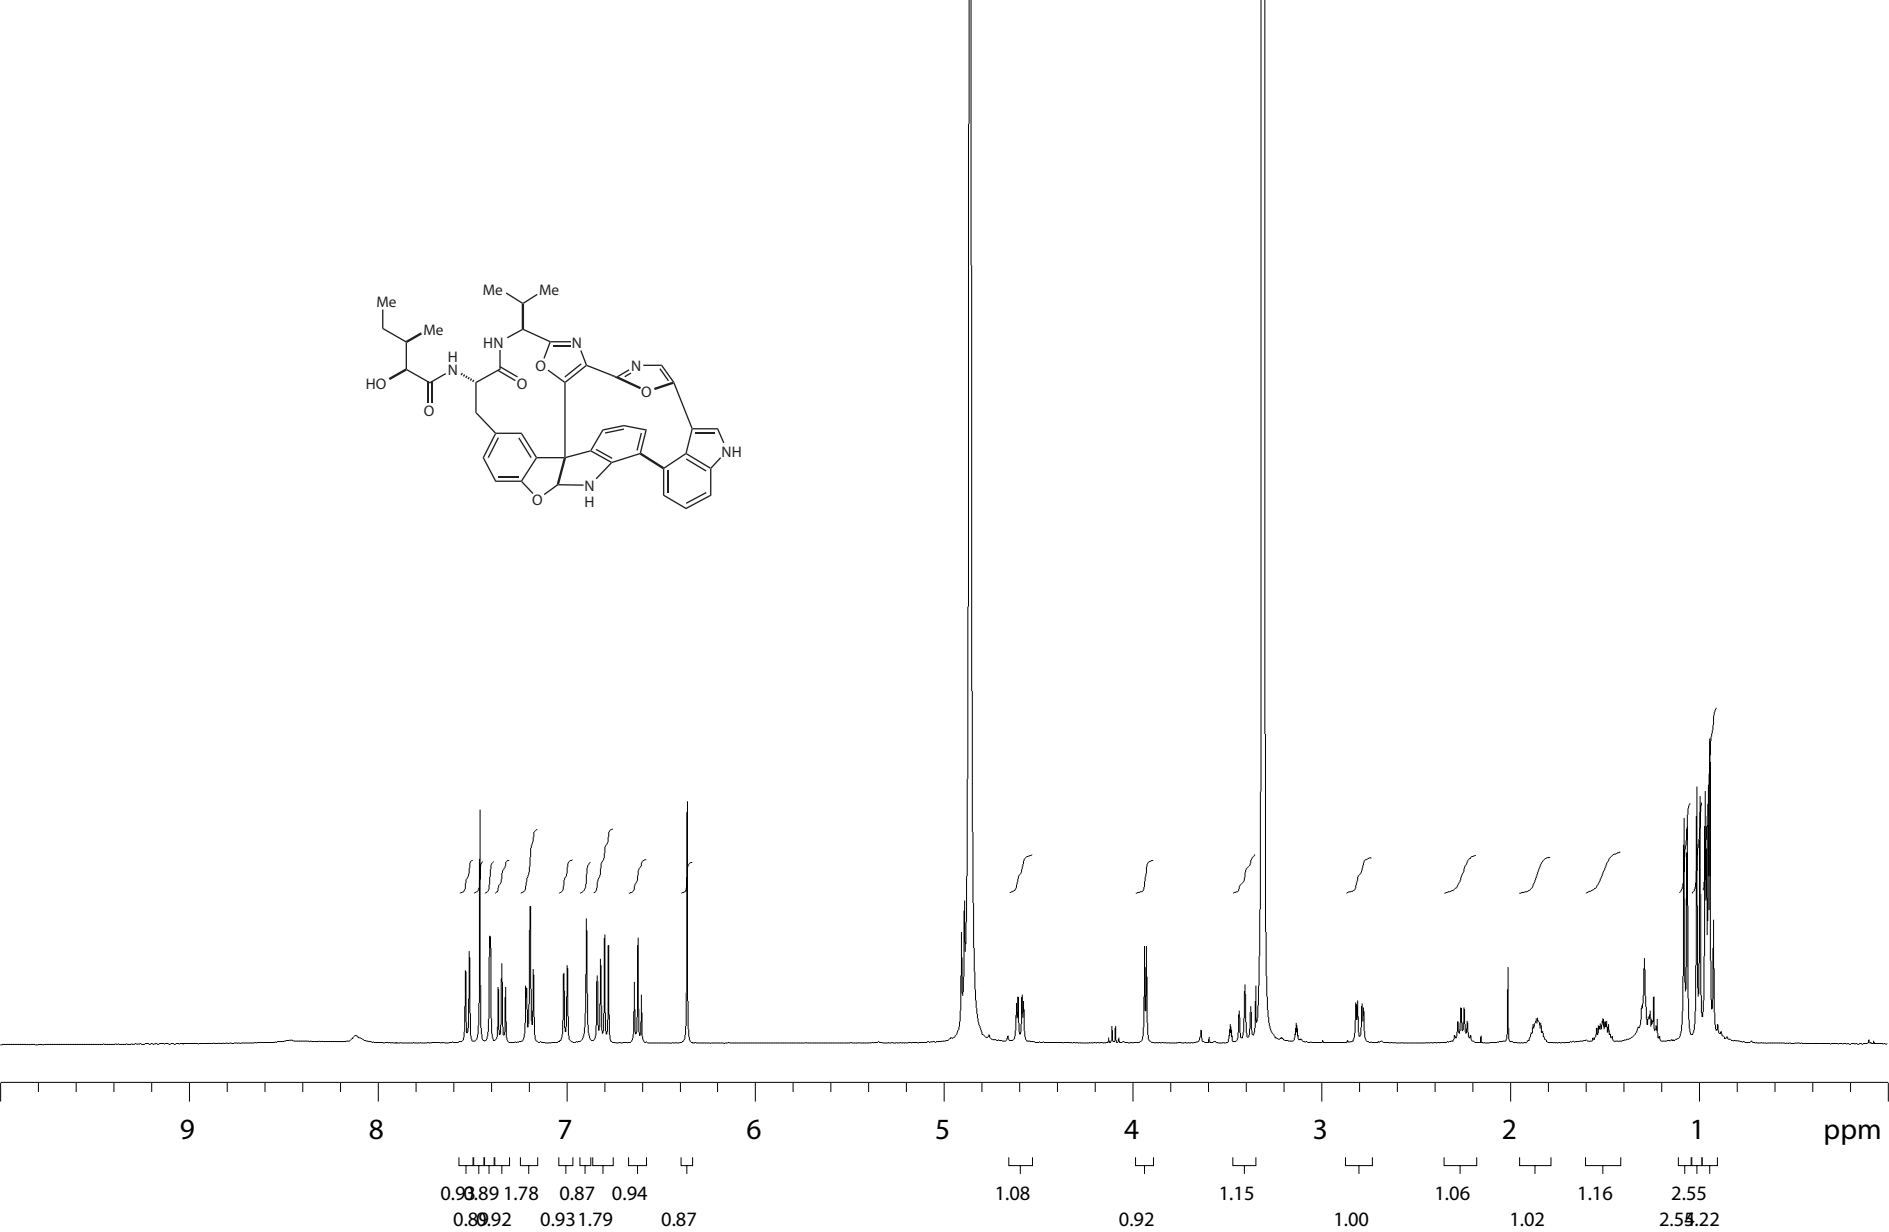

#273B (ABVII237"AB-5

exp1 std1h

| SAMPLE      |            | DEC. & VT  |          |
|-------------|------------|------------|----------|
| date        | Jan 4 2004 | dfrq       | 399.783  |
| solvent     | cd3od      | dn         | H1       |
| file        | exp        | dpwr       | 30       |
| ACQUISITION |            |            |          |
| sfrq        | 399.783    | dm         | nnn      |
| tn          | H1         | dmm        | c        |
| at          | 3.744      | dmf        | 200      |
| np          | 44932      | dseq       |          |
| sw          | 6000.6     | dres       | 1.0      |
| fb          | 3000       | homo       | n        |
| bs          | 8          | DEC2       |          |
| tpwr        | 54         | dfrq2      | 0        |
| pw          | 5.1        | dn2        |          |
| d1          | 2.000      | dpwr2      | 1        |
| tof         | 0          | dof2       | 0        |
| nt          | 64         | dm2        | n        |
| ct          | 56         | dmm2       | c        |
| alock       | n          | dmf2       | 200      |
| gain        | not used   | dseq2      |          |
| FLAGS       |            |            |          |
| il          | n          | dres2      | 1.0      |
| in          | n          | homo2      | n        |
| dp          | y          | PROCESSING |          |
| hs          | nn         | lb         | 0.50     |
| DISPLAY     |            |            |          |
| sp          | -0.2       | wtfile     | ft       |
| wp          | 3997.8     | proc       | not used |
| vs          | 6406       | fn         | f        |
| sc          | 0          | math       |          |
| wc          | 250        | werr       |          |
| hzmm        | 15.99      | wexp       |          |
| is          | 3160.85    | wbs        |          |
| rfl         | 2318.7     | wnt        |          |
| rfp         | 1323.3     |            |          |
| th          | 20         |            |          |
| ins         | 1.000      |            |          |
| nm          | cdc        | ph         |          |

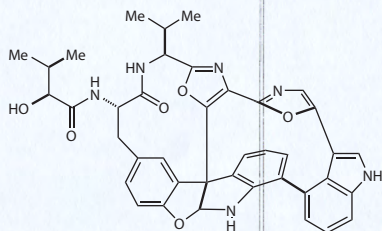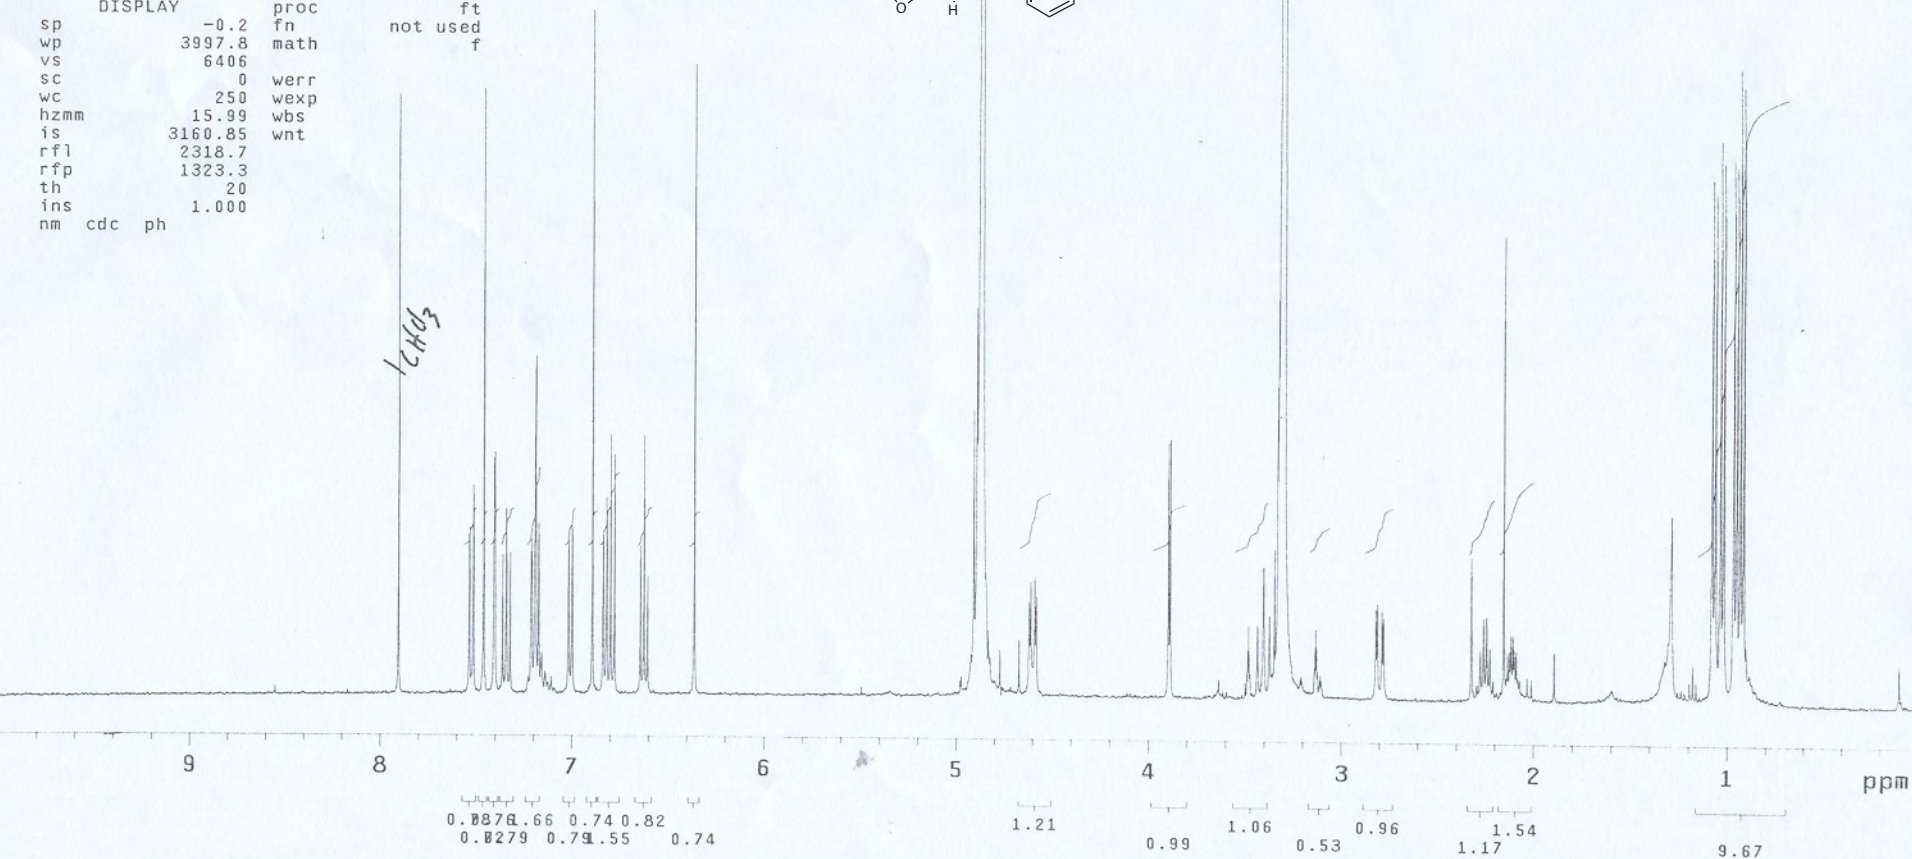



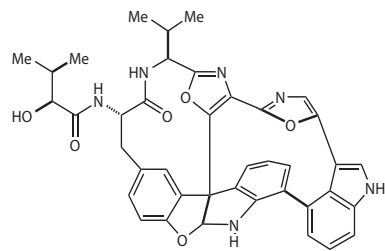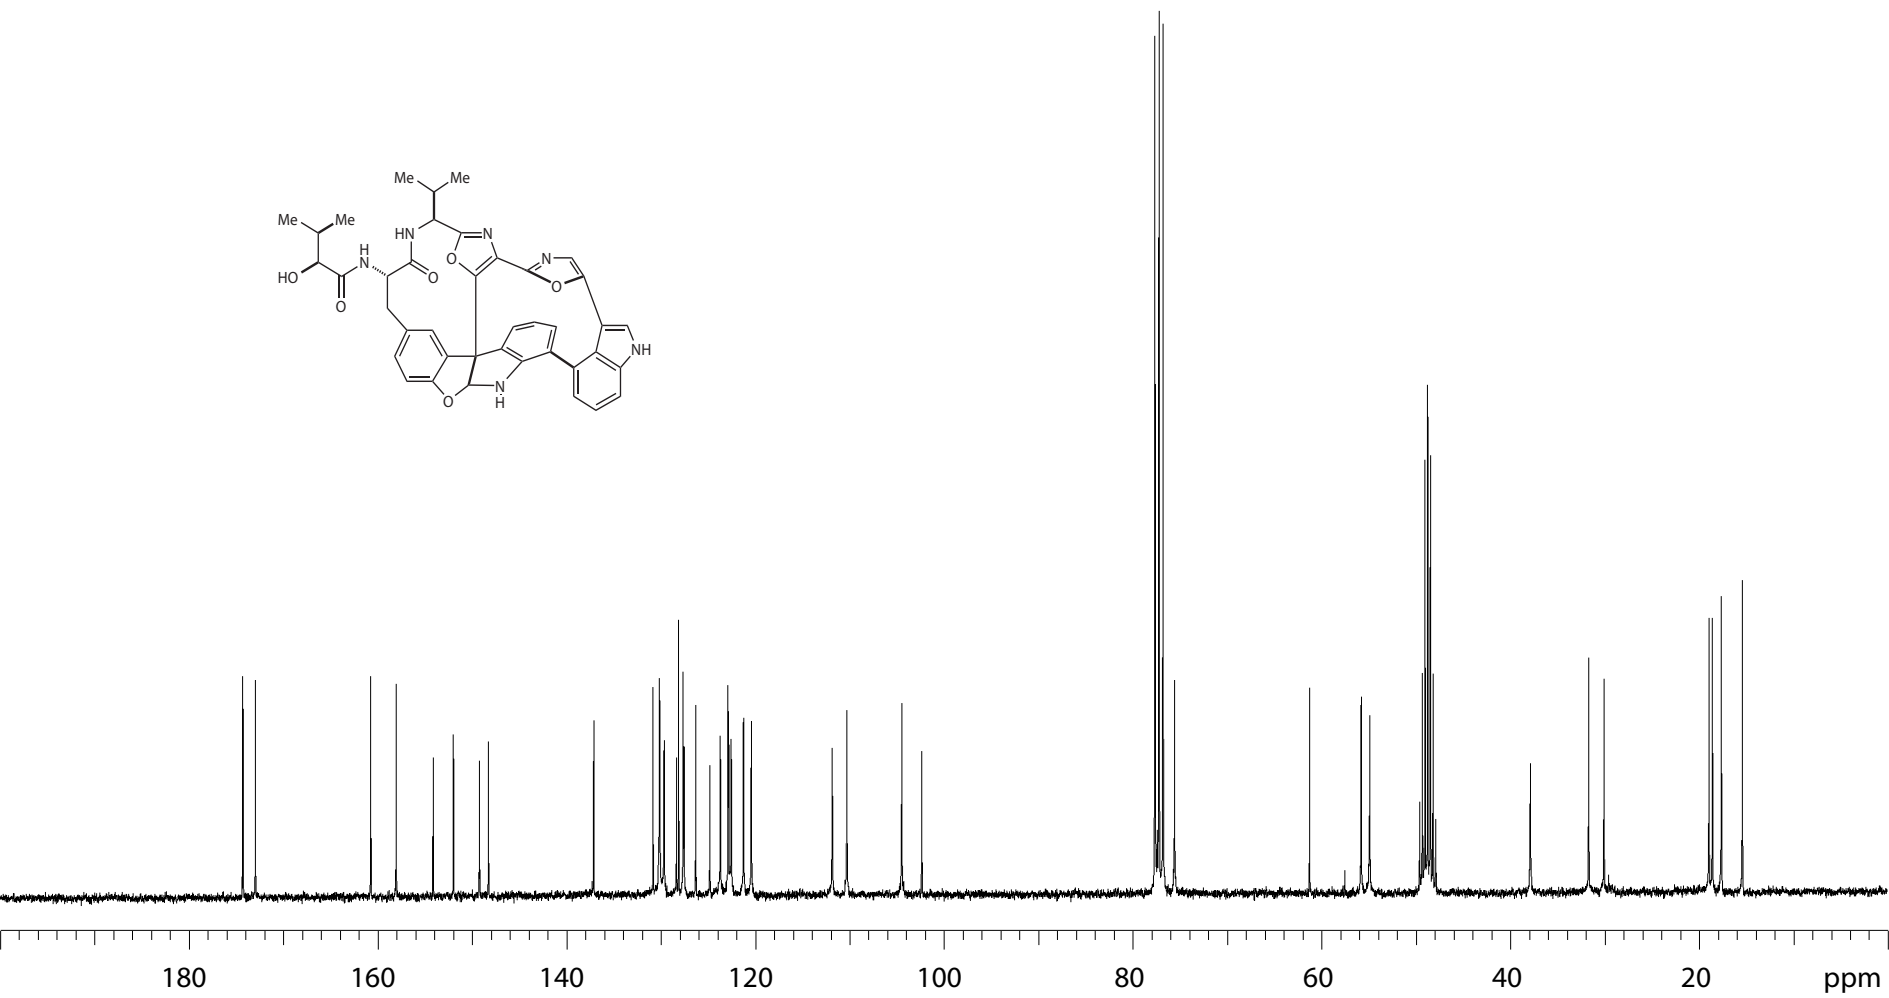

Supplement: pnas_0611340104_1.pdf [file pnas_0611340104_1.pdf]
